# Supplementary material for: Overexpression of the Oral Mucosa-Specific microRNA-31 Promotes Skin Wound Closure
Source: PubMed Central journal article supplement (PMC6696114; doi:10.3390/ijms20153679), 2019-07-27
Supplement: ijms-20-03679-s001.pdf [file ijms-20-03679-s001.pdf]

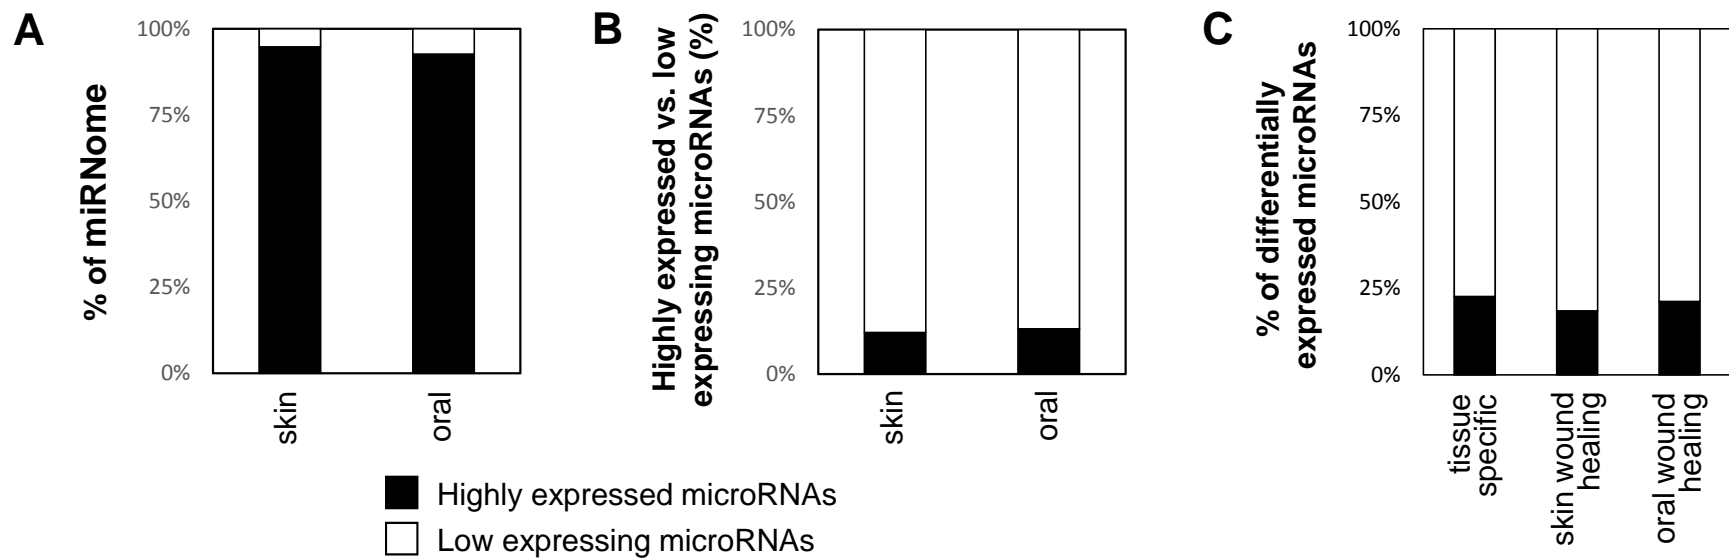

**Supplementary Figure S1: The highly expressed microRNAs account for major portion of the miRNome in oral and skin wounds, while the low expressing microRNAs dominant the percentage of unique mapped microRNA species.**

A previously reported miR-seq dataset on paired skin and oral mucosal wound healing [Sci. Rep. (2019) 9:7160] was used to examine the relationship of microRNA abundance and the number of unique microRNA species. The highly expressed microRNAs and the low expressing microRNAs are defined using the average number of mapped sequence reads of the overall miR-seq dataset (5458). **A**) The miRNome landscape was presented as histograms of percentage of mapped sequence reads vs. microRNAs grouped by their abundance (highly expressed microRNAs vs. low expressing microRNAs). **B**) The percentage of highly expressed microRNA species and low expressing microRNA species in skin and oral wounds were presented. **C**) Using a p value cut-off of 0.01, 53 are identified as tissue-specific differentially expressed microRNAs; 200 are differentially expressed in skin wound healing; 33 are differentially expressed in oral mucosal wound healing. The percentage of highly expressed microRNAs and low expressing microRNAs in each differentially expressed list is presented.

**Supplementary Figure S2: Relationship of sequencing accuracy and number of sequence reads.** Phred quality scores on the paired skin and oral mucosal wound healing miR-seq dataset were generated in real time during sequencing by Illumina platforms. A Histogram of the average phred score per base of mappable reads was presented. The phred score is the negative ratio of the error probability. Phred score larger than 30 stands for probability of incorrect base calls less than 1 in 1,000 (above 99.9% accuracy) in one sequencing read.

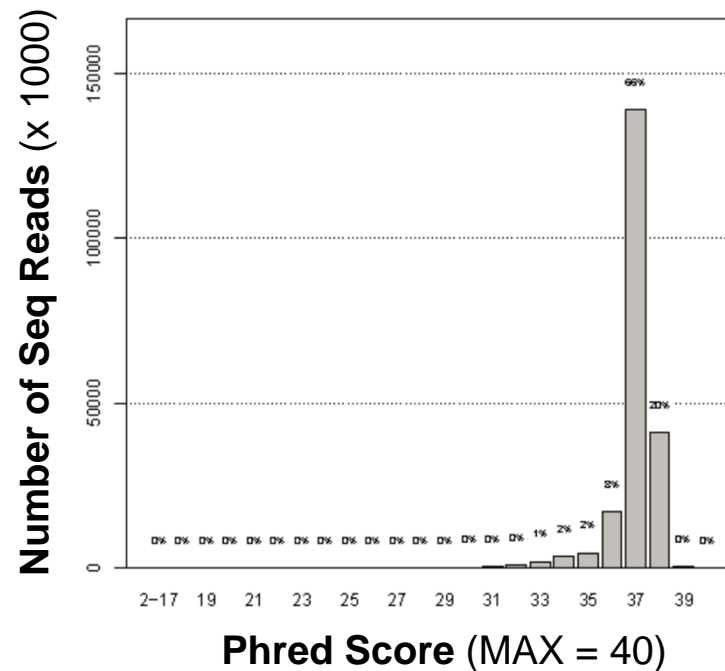

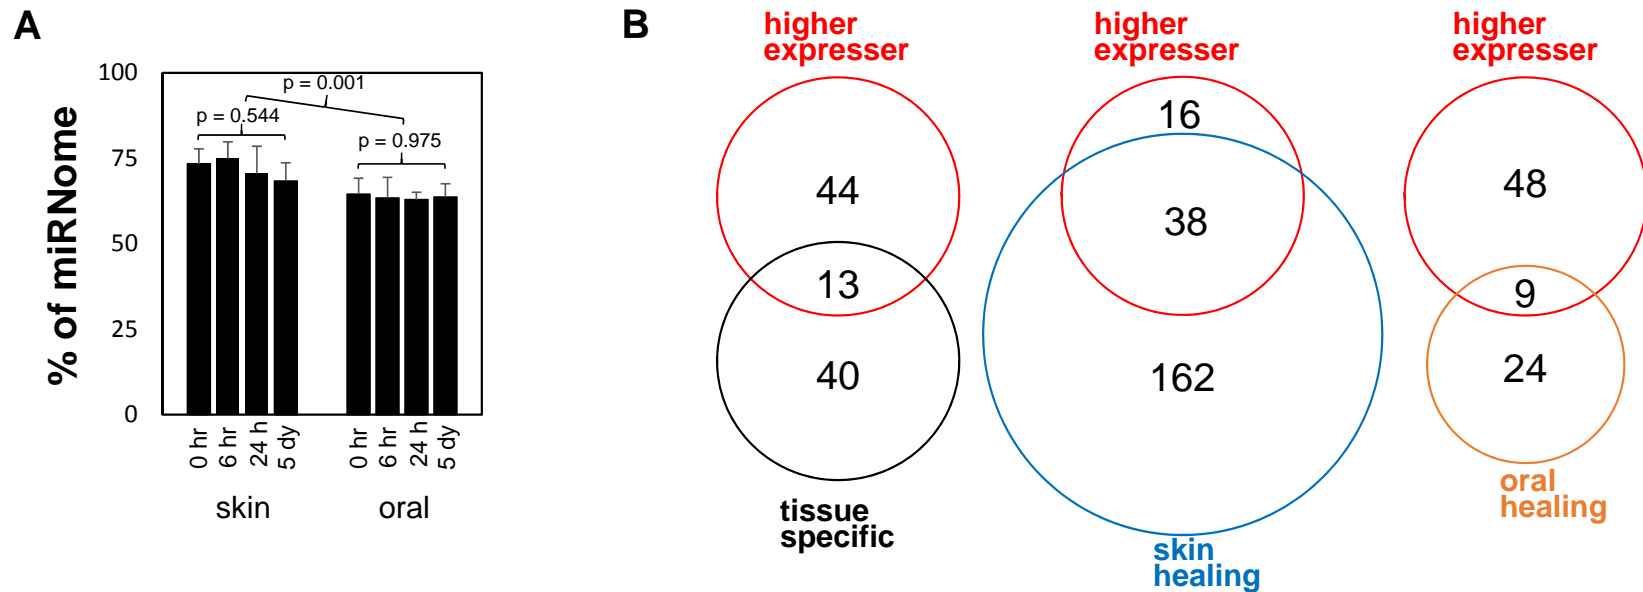

**Supplementary Figure S3: Characteristics of the 57 differentially expressed high expresser microRNAs.**

(A) The 57 differentially expressed high expresser microRNAs account for 73.4% and 64.5% of the miRNomes in skin and oral mucosa epithelium ( $p = 0.001$ ), and these fractions remaining relatively constant during the time course of the skin and oral mucosal wound healing ( $p=0.544$  and  $p=0.975$ , respectively). (B) Of the 57 differentially expressed high expresser microRNAs, 13 were previously identified as baseline tissue specific differentially expressed microRNAs, 38 were previously identified as differentially expressed microRNAs associated with skin wound healing, and 9 were previously identified as differentially expressed microRNAs associated with oral mucosal wound healing [Sci. Rep. (2019) 9:7160].

**Supplementary Figure S4: Tissue-specific differentially expressed microRNAs in skin and oral mucosal epithelium.** The microRNA profiling on matched mouse skin and oral mucosa samples (n=3, pooled) was performed using the MRA-1002 miRmouse v21 microarrays (LC Sciences, Houston, TX). Normalization and differential analysis were performed with CyberT. A panel of 85 tissue-specific differentially expressed microRNAs (q-value<0.01). List of the tissue-specific microRNAs was presented in Supplementary Table S2

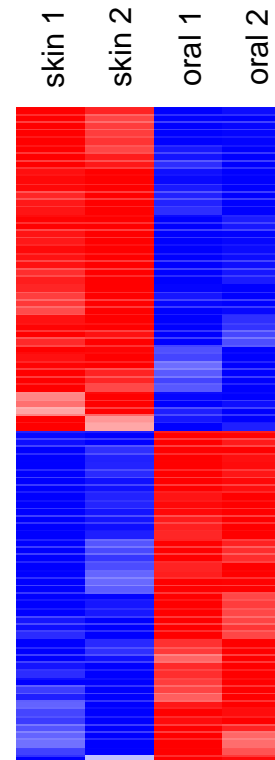

**Supplementary Figure S5: Confirmation of the microRNA mimic mediated up-regulation of miR-31 and miR-21 in mouse skin wounds.** The miR-31 mimic, miR-21 mimic or negative control mimic were delivered to the mouse skin wounds using an animal origin-free lipid nanoparticle (Invivofectamine 3.0 Reagent from Invitrogen) at the time of injury. The microRNA mimic mediated up-regulation of miR-31 (**A**) and miR-21 (**B**) was confirmed by TaqMan assay-based real time PCR quantification on day 1 wound samples (\* p < 0.05).

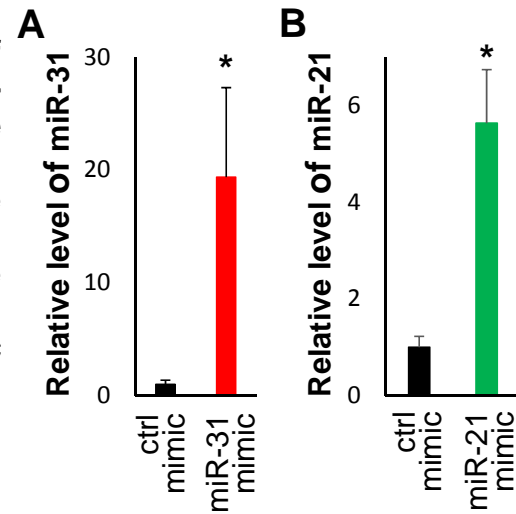



**Supplementary Table S2: Tissue-specific differentially expressed microRNAs in mouse skin and oral mucosal epithelium**

| <b>miR</b>       | <b>fold (oral/skin)</b> | <b>corr. q-val</b> |
|------------------|-------------------------|--------------------|
| mmu-miR-10b-5p   | -1.982199442            | 3.55E-11           |
| mmu-miR-451a     | 1.845365775             | 3.54E-10           |
| mmu-miR-7211-3p  | -1.743175942            | 5.49E-09           |
| mmu-miR-10a-5p   | -1.625557394            | 2.36E-08           |
| mmu-miR-6540-5p  | 1.410432231             | 2.50E-08           |
| mmu-miR-195a-3p  | 1.397298801             | 8.36E-08           |
| mmu-miR-3103-5p  | -1.374535577            | 2.82E-07           |
| mmu-miR-665-5p   | 1.346613823             | 3.47E-07           |
| mmu-miR-7082-5p  | -1.196566429            | 5.24E-07           |
| mmu-miR-6359     | 1.281108583             | 5.73E-07           |
| mmu-miR-214-3p   | 1.269240053             | 1.01E-06           |
| mmu-miR-7053-5p  | 1.352218936             | 1.13E-06           |
| mmu-miR-6934-3p  | 1.325204188             | 1.35E-06           |
| mmu-miR-678      | -1.413271872            | 1.42E-06           |
| mmu-miR-7647-3p  | -1.342698653            | 1.63E-06           |
| mmu-miR-7088-5p  | -1.485014367            | 3.10E-06           |
| mmu-miR-16-1-3p  | 1.337582778             | 3.60E-06           |
| mmu-miR-7045-5p  | -1.163735769            | 5.56E-06           |
| mmu-miR-7082-3p  | 1.29298308              | 6.54E-06           |
| mmu-miR-5104     | -1.31362353             | 8.28E-06           |
| mmu-miR-3473d    | 1.222056189             | 9.41E-06           |
| mmu-miR-34b-3p   | 1.215255043             | 9.74E-06           |
| mmu-miR-29c-5p   | -1.483350303            | 1.24E-05           |
| mmu-miR-150-5p   | 1.332006747             | 1.75E-05           |
| mmu-miR-7022-3p  | 1.338666348             | 2.35E-05           |
| mmu-miR-7075-5p  | -1.446507597            | 2.37E-05           |
| mmu-miR-676-3p   | -1.199742321            | 3.65E-05           |
| mmu-miR-7052-5p  | -1.246722765            | 3.76E-05           |
| mmu-miR-346-5p   | 1.430519097             | 4.41E-05           |
| mmu-miR-146b-5p  | -1.281482583            | 5.20E-05           |
| mmu-miR-196a-5p  | -1.284334608            | 5.54E-05           |
| mmu-miR-101a-3p  | -1.218546765            | 8.62E-05           |
| mmu-miR-3070b-3p | -1.266188851            | 8.69E-05           |
| mmu-miR-6942-5p  | -1.348172231            | 0.000124           |
| mmu-miR-1907     | -1.421860348            | 0.000134           |
| mmu-miR-705      | -1.139990737            | 0.000137           |
| mmu-miR-15a-3p   | 1.33767164              | 0.000196           |
| mmu-miR-126a-3p  | 1.241031615             | 0.000212           |
| mmu-miR-5112     | -1.221503256            | 0.000223           |
| mmu-miR-6931-5p  | -1.177801676            | 0.000303           |
| mmu-miR-6360     | 1.255440277             | 0.0004             |
| mmu-miR-3473e    | 1.172623409             | 0.000427           |
| mmu-miR-1983     | 1.176768986             | 0.000476           |
| mmu-miR-467a-5p  | 1.165063814             | 0.000629           |
| mmu-miR-374c-5p  | -1.211108401            | 0.000634           |

|                  |              |          |
|------------------|--------------|----------|
| mmu-miR-7235-5p  | -1.3195672   | 0.000667 |
| mmu-miR-375-3p   | 1.210377267  | 0.000668 |
| mmu-miR-199a-3p  | 1.173644383  | 0.000686 |
| mmu-miR-31-5p    | 1.146336437  | 0.000772 |
| mmu-miR-365-3p   | -1.230574533 | 0.000802 |
| mmu-miR-138-2-3p | 1.150686421  | 0.000809 |
| mmu-let-7f-5p    | -1.104261244 | 0.000827 |
| mmu-miR-207      | 1.172299327  | 0.000877 |
| mmu-miR-6980-5p  | -1.177513002 | 0.001088 |
| mmu-miR-1903     | 1.142199127  | 0.00113  |
| mmu-miR-7665-5p  | 1.196517681  | 0.001178 |
| mmu-miR-7028-5p  | -1.205054435 | 0.00124  |
| mmu-let-7k       | -1.220767225 | 0.001302 |
| mmu-miR-200c-3p  | -1.090876142 | 0.001477 |
| mmu-miR-6952-3p  | 1.141600262  | 0.001813 |
| mmu-miR-3098-3p  | 1.157332636  | 0.001904 |
| mmu-miR-7048-5p  | -1.165290162 | 0.002081 |
| mmu-miR-6996-5p  | 1.266197036  | 0.00211  |
| mmu-miR-6958-3p  | 1.214933705  | 0.002136 |
| mmu-miR-690      | -1.076752067 | 0.002158 |
| mmu-miR-7033-5p  | -1.147956187 | 0.002453 |
| mmu-miR-3569-3p  | 1.15329023   | 0.00252  |
| mmu-miR-7578     | 1.267530421  | 0.002837 |
| mmu-miR-3107-5p  | 1.158352835  | 0.002958 |
| mmu-miR-466p-5p  | -1.195193276 | 0.003021 |
| mmu-miR-1187     | 1.083117192  | 0.003603 |
| mmu-miR-6929-3p  | 1.138323233  | 0.003694 |
| mmu-miR-6368     | -1.142107201 | 0.003779 |
| mmu-miR-181d-5p  | 1.20708225   | 0.003878 |
| mmu-miR-7080-5p  | -1.196021925 | 0.00391  |
| mmu-miR-15b-5p   | -1.12129573  | 0.004122 |
| mmu-miR-6939-5p  | -1.175468921 | 0.004307 |
| mmu-miR-98-5p    | -1.165509765 | 0.004612 |
| mmu-miR-7049-3p  | 1.237488124  | 0.005555 |
| mmu-miR-214-5p   | 1.23282749   | 0.006668 |
| mmu-miR-7034-5p  | 1.140768613  | 0.006939 |
| mmu-let-7a-5p    | -1.066357154 | 0.007239 |
| mmu-miR-7211-5p  | 1.155266855  | 0.008024 |
| mmu-miR-7225-3p  | 1.122008402  | 0.008558 |
| mmu-miR-744-5p   | -1.211651849 | 0.009022 |

MicroRNA expression was measured using a mouse MicroRNA Microarray (LC Sciences) on pooled RNA samples isolated from mouse skin and oral mucosa samples (n=3). Differential expression analysis was performed with CyberT using a VSN normalization procedure.

Multiple hypothesis testing correction is performed with Bonferroni procedure, and Bonferroni corrected q-values were presented.

Cut-off q-value of 0.01 was used.



**Supplementary Table S3: Validation of the tissue specificity of 57 differentially expressed high expresser microRNAs with independent miR profiling experiments**

| Index | Reporter Name   | cluster * | Original Dataset ** | Validation Dataset*** |
|-------|-----------------|-----------|---------------------|-----------------------|
|       |                 |           | tissue specific     | tissue specific       |
| 80    | mmu-miR-10a-5p  | I         | 1                   | 1                     |
| 1     | rno-miR-378a-3p | I         | 1                   | x                     |
| 38    | mmu-miR-223-3p  | I         | 1                   | no match              |
| 65    | mmu-miR-146b-5p | I         | 1                   | 1                     |
| 73    | mmu-miR-133a-3p | I         | 1                   | x                     |
| 48    | mmu-miR-1a-3p   | I         | 1                   | x                     |
| 42    | mmu-miR-206-3p  | I         | x                   | x                     |
| 79    | mmu-miR-10b-5p  | I         | 1                   | 1                     |
| 11    | mmu-miR-541-5p  | I         | x                   | no match              |
| 72    | mmu-miR-133b-3p | I         | x                   | x                     |
| 17    | mmu-miR-434-5p  | I         | x                   | no match              |
| 74    | mmu-miR-127-3p  | I         | x                   | no match              |
| 82    | mmu-let-7j      | I         | x                   | x                     |
| 70    | mmu-miR-142a-5p | I         | x                   | no match              |
| 41    | mmu-miR-21a-5p  | II        | x                   | x                     |
| 63    | mmu-miR-148b-3p | II        | x                   | x                     |
| 2     | rno-miR-25-3p   | II        | x                   | x                     |
| 83    | mmu-let-7g-5p   | II        | x                   | x                     |
| 5     | ptr-let-7i      | II        | x                   | x                     |
| 3     | rno-miR-140-3p  | II        | x                   | x                     |
| 12    | mmu-miR-5099    | II        | x                   | x                     |
| 58    | mmu-miR-15b-5p  | II        | x                   | 1                     |
| 59    | mmu-miR-152-3p  | II        | x                   | x                     |
| 28    | mmu-miR-30a-5p  | III       | 1                   | x                     |
| 51    | mmu-miR-195a-5p | III       | x                   | x                     |
| 25    | mmu-miR-30d-5p  | III       | x                   | x                     |
| 33    | mmu-miR-26a-5p  | III       | x                   | x                     |
| 8     | mmu-miR-96-5p   | III       | 1                   | no match              |
| 7     | mmu-miR-99a-5p  | III       | x                   | x                     |
| 67    | mmu-miR-145a-5p | III       | x                   | x                     |
| 47    | mmu-miR-200a-3p | III       | x                   | x                     |
| 34    | mmu-miR-24-3p   | III       | x                   | x                     |
| 69    | mmu-miR-143-3p  | III       | x                   | x                     |
| 84    | mmu-let-7f-5p   | III       | x                   | 1                     |
| 53    | mmu-miR-186-5p  | III       | x                   | x                     |
| 23    | mmu-miR-31-5p   | IV        | 1                   | 1                     |
| 50    | mmu-miR-199a-5p | IV        | x                   | x                     |
| 76    | mmu-miR-126a-3p | IV        | x                   | 1                     |
| 21    | mmu-miR-34c-5p  | IV        | 1                   | no match              |
| 16    | mmu-miR-451a    | IV        | 1                   | 1                     |
| 49    | mmu-miR-199b-3p | IV        | x                   | 1                     |
| 75    | mmu-miR-126a-5p | IV        | 1                   | no match              |
| 35    | mmu-miR-24-2-5p | IV        | x                   | x                     |
| 36    | mmu-miR-23b-3p  | V         | x                   | x                     |
| 44    | mmu-miR-203-3p  | V         | x                   | x                     |
| 46    | mmu-miR-200b-3p | V         | x                   | x                     |
| 77    | mmu-miR-125b-5p | V         | x                   | x                     |
| 45    | mmu-miR-200c-3p | V         | x                   | 1                     |
| 30    | mmu-miR-27b-3p  | V         | x                   | x                     |
| 56    | mmu-miR-181a-5p | V         | x                   | x                     |
| 78    | mmu-miR-125a-5p | V         | x                   | x                     |
| 55    | mmu-miR-182-5p  | V         | x                   | x                     |
| 68    | mmu-miR-145a-3p | V         | x                   | no match              |
| 37    | mmu-miR-23a-3p  | V         | x                   | x                     |
| 43    | mmu-miR-205-5p  | V         | x                   | x                     |
| 54    | mmu-miR-183-5p  | V         | x                   | x                     |
| 88    | mmu-let-7b-5p   | V         | x                   | x                     |

miRNAs shown significant difference ( $p < 0.01$ ), and have the number of reads  $>$  the average (5458) of the dataset.

\*: clusters were defined based on Hierarchical Clustering analysis using Morpheus.

\*\*: Original dataset:Tissue-specific differential expressed miRs were defined in [Sci. Rep. (2019) 9:7160].

\*\*\*: Validation dataset 1: Tissue-specific differential expressed miRs were identified by microarray analysis using paired skin and oral mucosal tissue samples from mice.

**Supplementary Table S4: Statistical analysis on differential expression of selected microRNAs**

**Cluster I**

**mmu-miR-10b-5p**

**miR-Seq**

| hour | skin    | oral    | stdev (s) | stdev (o) |
|------|---------|---------|-----------|-----------|
| 0    | 1       | 0.16388 | 0.15904   | 0.0479    |
| 6    | 0.92243 | 0.15016 | 0.40317   | 0.04879   |
| 24   | 0.30263 | 0.14704 | 0.09113   | 0.03919   |
| 120  | 0.20605 | 0.1517  | 0.06824   | 0.02766   |

one-way ANOVA (skin) **p-value = 0.0042662840**  
 one-way ANOVA (oral) p-value = 0.9613844771

two-way ANOVA **p-value = 3.514122e-6**

**LCM/TaqMan**

| hour | skin    | oral    | stdev (s) | stdev (o) |
|------|---------|---------|-----------|-----------|
| 0    | 1.05813 | 0.05347 | 0.4068    | 0.01685   |
| 6    | 1.33081 | 0.03662 | 0.48886   | 0.02027   |
| 24   | 0.42458 | 0.08254 | 0.31821   | 0.08102   |
| 120  | 0.27895 | 0.04671 | 0.18151   | 0.0611    |

one-way ANOVA (skin) **p-value = 0.0000004779**  
 one-way ANOVA (oral) p-value = 0.4325128555

two-way ANOVA **p-value = 1.951684e-8**

**mmu-miR-223-3p**

**miR-Seq**

| hour | skin     | oral     | stdev (s) | stdev (o) |
|------|----------|----------|-----------|-----------|
| 0    | 0.999953 | 0.408908 | 0.189619  | 0.033747  |
| 6    | 3.472382 | 1.087826 | 1.045229  | 0.353727  |
| 24   | 21.88087 | 1.522174 | 7.092387  | 1.005989  |
| 120  | 5.341474 | 0.439913 | 2.798091  | 0.07146   |

one-way ANOVA (skin) **p-value = 0.0006251456**  
 one-way ANOVA (oral) p-value = 0.0924204518

two-way ANOVA **p-value = 1.071586e-5**

**LCM/TaqMan**

| hour | skin    | oral    | stdev (s) | stdev (o) |
|------|---------|---------|-----------|-----------|
| 0    | 1.00479 | 0.22033 | 0.1055    | 0.1498    |
| 6    | 6.96063 | 4.32524 | 3.43335   | 2.17314   |
| 24   | 90.333  | 0.82264 | 22.3316   | 0.14561   |
| 120  | 71.283  | 0.46588 | 36.6742   | 0.11096   |

one-way ANOVA (skin) **p-value = 0.0005539250**  
 one-way ANOVA (oral) **p-value = 0.0000051701**

two-way ANOVA **p-value = 1.393415e-6**

**Cluster II**

**mmu-miR-21-5p**

**miR-Seq**

| hour | skin     | oral     | stdev (s) | stdev (o) |
|------|----------|----------|-----------|-----------|
| 0    | 1.000012 | 0.962027 | 0.253921  | 0.212693  |
| 6    | 1.99411  | 1.932654 | 0.280097  | 1.395369  |
| 24   | 4.56857  | 3.380248 | 0.344211  | 0.651479  |
| 120  | 8.705052 | 3.00985  | 1.466047  | 0.855424  |

one-way ANOVA (skin) **p-value = 0.0000085387**  
 one-way ANOVA (oral) **p-value = 0.0381469755**

two-way ANOVA **p-value = 1.008347e-4**

**LCM/TaqMan**

| hour | skin    | oral    | stdev (s) | stdev (o) |
|------|---------|---------|-----------|-----------|
| 0    | 1.1171  | 0.31085 | 0.54907   | 0.2744    |
| 6    | 0.94479 | 0.13192 | 0.34645   | 0.07162   |
| 24   | 1.61073 | 1.26236 | 0.47516   | 1.3955    |
| 120  | 4.80132 | 1.32614 | 2.10515   | 0.79613   |

one-way ANOVA (skin) **p-value = 0.0000000000**  
 one-way ANOVA (oral) **p-value = 0.0070474133**

two-way ANOVA **p-value = 0.000000e+0**

**mmu-miR-140-3p**

**miR-Seq**

| hour | skin     | oral     | stdev (s) | stdev (o) |
|------|----------|----------|-----------|-----------|
| 0    | 1.000043 | 2.391934 | 0.032481  | 0.996564  |
| 6    | 0.816283 | 2.034733 | 0.129787  | 0.363597  |
| 24   | 2.936411 | 2.40483  | 0.404628  | 1.364335  |
| 120  | 1.611947 | 2.471958 | 0.037683  | 0.4306    |

one-way ANOVA (skin) **p-value = 0.0000077748**  
 one-way ANOVA (oral) p-value = 0.9286297066

two-way ANOVA **p-value = 0.01341338**

**LCM/TaqMan**

| hour | skin    | oral    | stdev (s) | stdev (o) |
|------|---------|---------|-----------|-----------|
| 0    | 1       | 0.37114 | 0.93355   | 0.3016    |
| 6    | 3.7718  | 1.27243 | 2.34304   | 0.46806   |
| 24   | 6.80201 | 0.48988 | 5.23345   | 0.22643   |
| 120  | 5.65733 | 1.41787 | 4.49115   | 0.31332   |

one-way ANOVA (skin) **p-value = 0.0024882129**  
 one-way ANOVA (oral) **p-value = 0.0000007733**

two-way ANOVA **p-value = 8.485368e-11**

**Cluster III**

**mmu-miR-99a-5p**

**miR-Seq**

| hour | skin     | oral     | stdev (s) | stdev (o) |
|------|----------|----------|-----------|-----------|
| 0    | 1        | 1.140749 | 0.0842    | 0.178556  |
| 6    | 1.5238   | 1.386114 | 0.182855  | 0.348079  |
| 24   | 0.873889 | 1.039303 | 0.208621  | 0.085498  |
| 120  | 0.537912 | 1.013975 | 0.148197  | 0.049289  |

one-way ANOVA (skin) **p-value = 0.0005390556**  
 one-way ANOVA (oral) p-value = 0.1752214836

**LCM/TaqMan**

| hour | skin    | oral    | stdev (s) | stdev (o) |
|------|---------|---------|-----------|-----------|
| 0    | 1.03602 | 2.7167  | 0.28881   | 1.63517   |
| 6    | 3.26437 | 2.85863 | 1.77585   | 1.516     |
| 24   | 0.9841  | 1.10762 | 0.39102   | 0.34286   |
| 120  | 1.14221 | 1.47977 | 0.1581    | 0.40894   |

one-way ANOVA (skin) **p-value = 0.0168764875**  
 one-way ANOVA (oral) p-value = 0.1988154933

two-way ANOVA p-value = 4.689403e-2

two-way ANOVA p-value = 1.579563e-1

**mmu-miR-26a-5p**

**miR-Seq**

|      | skin | oral     | stdev (s) | stdev (o) |
|------|------|----------|-----------|-----------|
| hour | 0    | 1        | 0.75499   | 0.225197  |
|      | 6    | 0.854867 | 0.777713  | 0.115354  |
|      | 24   | 0.482248 | 0.647254  | 0.036568  |
|      | 120  | 0.403676 | 0.58426   | 0.056791  |

one-way ANOVA (skin) p-value = 0.0013458458

one-way ANOVA (oral) p-value = 0.1059181021

two-way ANOVA p-value = 9.013084e-1

**LCM/TaqMan**

|      | skin | oral    | stdev (s) | stdev (o) |
|------|------|---------|-----------|-----------|
| hour | 0    | 1.00351 | 0.70583   | 0.09241   |
|      | 6    | 1.40049 | 0.49348   | 0.21375   |
|      | 24   | 0.21055 | 0.1531    | 0.1158    |
|      | 120  | 0.47231 | 0.63376   | 0.14798   |

one-way ANOVA (skin) p-value = 0.0000000000

one-way ANOVA (oral) p-value = 0.0000000001

two-way ANOVA p-value = 5.532423e-10

**Cluster IV**

**mmu-miR-31-5p**

**miR-Seq**

|      | skin | oral     | stdev (s) | stdev (o) |
|------|------|----------|-----------|-----------|
| hour | 0    | 0.999445 | 22.83856  | 0.32007   |
|      | 6    | 0.668761 | 18.30634  | 0.422295  |
|      | 24   | 0.840345 | 21.58825  | 0.388254  |
|      | 120  | 11.68245 | 33.95408  | 1.796909  |

one-way ANOVA (skin) p-value = 0.0000012741

one-way ANOVA (oral) p-value = 0.0013593949

two-way ANOVA p-value = 2.132738e-13

**LCM/TaqMan**

|      | skin | oral    | stdev (s) | stdev (o) |
|------|------|---------|-----------|-----------|
| hour | 0    | 1.03405 | 6.83589   | 0.27175   |
|      | 6    | 0.45834 | 10.0726   | 0.21271   |
|      | 24   | 0.20257 | 8.63327   | 0.05702   |
|      | 120  | 17.5665 | 46.2521   | 4.16547   |

one-way ANOVA (skin) p-value = 0.0000000001

one-way ANOVA (oral) p-value = 0.0000422971

two-way ANOVA p-value = 1.503829e-5

**mmu-miR-451a**

**miR-Seq**

|      | skin | oral     | stdev (s) | stdev (o) |
|------|------|----------|-----------|-----------|
| hour | 0    | 1.000601 | 20.20339  | 0.302476  |
|      | 6    | 3.568201 | 12.31014  | 0.832018  |
|      | 24   | 4.648233 | 20.71412  | 1.287771  |
|      | 120  | 6.477267 | 9.422348  | 6.510191  |

one-way ANOVA (skin) p-value = 0.3112343244

one-way ANOVA (oral) p-value = 0.5880771974

two-way ANOVA p-value = 4.604120e-3

**LCM/TaqMan**

|      | skin | oral    | stdev (s) | stdev (o) |
|------|------|---------|-----------|-----------|
| hour | 0    | 1       | 8.52394   | 0.52108   |
|      | 6    | 75.7683 | 39.9092   | 59.1761   |
|      | 24   | 42.3235 | 101.572   | 53.6771   |
|      | 120  | 67.436  | 240.362   | 73.0032   |

one-way ANOVA (skin) p-value = 0.0495521565

one-way ANOVA (oral) p-value = 0.0000203422

two-way ANOVA p-value = 1.102023e-1

**mmu-miR-34c-5p**

**miR-Seq**

|      | skin | oral    | stdev (s) | stdev (o) |
|------|------|---------|-----------|-----------|
| hour | 0    | 1.0029  | 83.8442   | 0.35551   |
|      | 6    | 1.89588 | 156.927   | 0.31428   |
|      | 24   | 3.45167 | 65.0702   | 0.59518   |
|      | 120  | 35.32   | 47.1006   | 30.0751   |

one-way ANOVA (skin) p-value = 0.0628504365

one-way ANOVA (oral) p-value = 0.5435316838

two-way ANOVA p-value = 1.296908e-2

**LCM/TaqMan**

|      | skin | oral    | stdev (s) | stdev (o) |
|------|------|---------|-----------|-----------|
| hour | 0    | 1.17721 | 64.2194   | 0.74403   |
|      | 6    | 1.5443  | 82.8872   | 0.4456    |
|      | 24   | 2.96769 | 35.3505   | 1.53904   |
|      | 120  | 14.4752 | 162.254   | 2.07662   |

one-way ANOVA (skin) p-value = 0.0000000000

one-way ANOVA (oral) p-value = 0.0022578420

two-way ANOVA p-value = 1.307810e-9

**mmu-miR-24-2-5p**

**miR-Seq**

|      | skin | oral    | stdev (s) | stdev (o) |
|------|------|---------|-----------|-----------|
| hour | 0    | 1.00001 | 0.85222   | 0.04154   |
|      | 6    | 0.73267 | 0.80686   | 0.05773   |
|      | 24   | 0.51965 | 0.91515   | 0.12041   |
|      | 120  | 0.73675 | 0.83981   | 0.07881   |

one-way ANOVA (skin) p-value = 0.0006448633

one-way ANOVA (oral) p-value = 0.8934766793

two-way ANOVA p-value = 7.469976e-2

**LCM/TaqMan**

|      | skin | oral    | stdev (s) | stdev (o) |
|------|------|---------|-----------|-----------|
| hour | 0    | 1.02554 | 0.68663   | 0.24149   |
|      | 6    | 0.82815 | 0.64816   | 0.05124   |
|      | 24   | 0.71884 | 0.4451    | 0.20117   |
|      | 120  | 0.53665 | 0.80411   | 0.0627    |

one-way ANOVA (skin) p-value = 0.0004074361

one-way ANOVA (oral) p-value = 0.0378170837

two-way ANOVA p-value = 1.629529e-2

**mmu-miR-126a-5p**

**miR-Seq**

|  | skin | oral | stdev (s) | stdev (o) |
|--|------|------|-----------|-----------|
|--|------|------|-----------|-----------|

**LCM/TaqMan**

|  | skin | oral | stdev (s) | stdev (o) |
|--|------|------|-----------|-----------|
|--|------|------|-----------|-----------|

|      |     |         |         |         |         |
|------|-----|---------|---------|---------|---------|
| hour | 0   | 0.9999  | 1.86429 | 0.14287 | 0.28658 |
|      | 6   | 1.53863 | 2.16924 | 0.27783 | 0.51213 |
|      | 24  | 0.93591 | 1.86845 | 0.32264 | 0.72061 |
|      | 120 | 1.54199 | 1.34584 | 0.28748 | 0.2903  |

one-way ANOVA (skin) [p-value = 0.0367424477](#)  
 one-way ANOVA (oral) [p-value = 0.2915927220](#)

two-way ANOVA [p-value = 3.080962e-3](#)

#### mmu-miR-126a-3p

##### miR-Seq

|      | skin | oral    | stdev (s) | stdev (o) |         |
|------|------|---------|-----------|-----------|---------|
| hour | 0    | 1.00002 | 1.19993   | 0.02154   | 0.07708 |
|      | 6    | 0.95078 | 1.28321   | 0.14976   | 0.14097 |
|      | 24   | 0.71712 | 1.11503   | 0.08872   | 0.11381 |
|      | 120  | 1.03943 | 1.23769   | 0.05516   | 0.10387 |

one-way ANOVA (skin) [p-value = 0.0107302984](#)  
 one-way ANOVA (oral) [p-value = 0.3604404602](#)

two-way ANOVA [p-value = 4.500348e-6](#)

#### mmu-miR-199a-5p

##### miR-Seq

|      | skin | oral    | stdev (s) | stdev (o) |         |
|------|------|---------|-----------|-----------|---------|
| hour | 0    | 1       | 1.28941   | 0.05623   | 0.13984 |
|      | 6    | 0.74372 | 1.38509   | 0.14003   | 0.15188 |
|      | 24   | 0.49441 | 1.13167   | 0.11297   | 0.10105 |
|      | 120  | 1.25567 | 1.28514   | 0.26768   | 0.15811 |

one-way ANOVA (skin) [p-value = 0.0024600154](#)  
 one-way ANOVA (oral) [p-value = 0.2449372673](#)

two-way ANOVA [p-value = 8.279114e-6](#)

#### mmu-miR-199b-3p

##### miR-Seq

|      | skin | oral    | stdev (s) | stdev (o) |         |
|------|------|---------|-----------|-----------|---------|
| hour | 0    | 1.00002 | 1.61231   | 0.29356   | 0.11655 |
|      | 6    | 1.33978 | 2.08999   | 0.2308    | 0.05308 |
|      | 24   | 1.21826 | 1.78838   | 0.12986   | 0.50673 |
|      | 120  | 1.74177 | 2.02731   | 0.13536   | 0.14602 |

one-way ANOVA (skin) [p-value = 0.0144157380](#)  
 one-way ANOVA (oral) [p-value = 0.1954840301](#)

two-way ANOVA [p-value = 3.915706e-5](#)

### Cluster V

#### mmu-miR-125b-5p

##### miR-Seq

|      | skin | oral     | stdev (s) | stdev (o) |          |
|------|------|----------|-----------|-----------|----------|
| hour | 0    | 1.000001 | 1.138808  | 0.261571  | 0.157288 |
|      | 6    | 0.602217 | 0.948907  | 0.100906  | 0.23488  |
|      | 24   | 0.316224 | 0.641391  | 0.035158  | 0.100507 |
|      | 120  | 0.494231 | 0.738349  | 0.075924  | 0.139347 |

one-way ANOVA (skin) [p-value = 0.0026510959](#)  
 one-way ANOVA (oral) [p-value = 0.0250541501](#)

two-way ANOVA [p-value = 7.743095e-4](#)

#### mmu-miR-125a-5p

##### miR-Seq

|      | skin | oral     | stdev (s) | stdev (o) |          |
|------|------|----------|-----------|-----------|----------|
| hour | 0    | 0.999995 | 0.784881  | 0.337814  | 0.103334 |
|      | 6    | 0.521206 | 0.677937  | 0.104037  | 0.236693 |
|      | 24   | 0.290362 | 0.360574  | 0.031068  | 0.091706 |
|      | 120  | 0.470782 | 0.596849  | 0.091684  | 0.145685 |

one-way ANOVA (skin) [p-value = 0.0080004410](#)

|      |     |         |         |         |         |
|------|-----|---------|---------|---------|---------|
| hour | 0   | 1.02281 | 1.13154 | 0.23304 | 0.61011 |
|      | 6   | 0.82478 | 0.74533 | 0.21692 | 0.09552 |
|      | 24  | 0.60181 | 0.50036 | 0.18889 | 0.26269 |
|      | 120 | 0.75244 | 0.90493 | 0.17029 | 0.13916 |

one-way ANOVA (skin) [p-value = 0.0153397840](#)  
 one-way ANOVA (oral) [p-value = 0.0311976849](#)

two-way ANOVA [p-value = 8.064029e-1](#)

##### LCM/TaqMan

|      | skin | oral    | stdev (s) | stdev (o) |         |
|------|------|---------|-----------|-----------|---------|
| hour | 0    | 1.0121  | 1.08732   | 0.17104   | 0.33538 |
|      | 6    | 1.07103 | 1.06201   | 0.26453   | 0.1185  |
|      | 24   | 0.75819 | 0.59221   | 0.07656   | 0.19267 |
|      | 120  | 0.84919 | 0.99827   | 0.04835   | 0.3132  |

one-way ANOVA (skin) [p-value = 0.0126603858](#)  
 one-way ANOVA (oral) [p-value = 0.0101819129](#)

two-way ANOVA [p-value = 8.434429e-1](#)

##### LCM/TaqMan

|      | skin | oral    | stdev (s) | stdev (o) |         |
|------|------|---------|-----------|-----------|---------|
| hour | 0    | 1.03981 | 1.66483   | 0.31694   | 0.80451 |
|      | 6    | 1.0016  | 1.03396   | 0.1058    | 0.22706 |
|      | 24   | 0.78837 | 0.58865   | 0.12739   | 0.10116 |
|      | 120  | 1.40373 | 1.11833   | 0.51087   | 0.25234 |

one-way ANOVA (skin) [p-value = 0.0215631834](#)  
 one-way ANOVA (oral) [p-value = 0.0041670237](#)

two-way ANOVA [p-value = 6.975289e-1](#)

##### LCM/TaqMan

|      | skin | oral    | stdev (s) | stdev (o) |         |
|------|------|---------|-----------|-----------|---------|
| hour | 0    | 1.00866 | 1.53192   | 0.14737   | 0.42251 |
|      | 6    | 0.93754 | 0.90036   | 0.20295   | 0.09239 |
|      | 24   | 1.03203 | 0.60616   | 0.17864   | 0.18131 |
|      | 120  | 0.92642 | 0.87223   | 0.11186   | 0.05888 |

one-way ANOVA (skin) [p-value = 0.6181493984](#)  
 one-way ANOVA (oral) [p-value = 0.0000120929](#)

two-way ANOVA [p-value = 9.796490e-1](#)

##### LCM/TaqMan

|      | skin | oral    | stdev (s) | stdev (o) |         |
|------|------|---------|-----------|-----------|---------|
| hour | 0    | 1.0807  | 1.81417   | 0.38263   | 0.6528  |
|      | 6    | 1.09994 | 0.33573   | 0.31694   | 0.13976 |
|      | 24   | 0.27759 | 0.74107   | 0.27759   | 0.37983 |
|      | 120  | 1.04861 | 0.86166   | 0.40312   | 0.42776 |

one-way ANOVA (skin) [p-value = 0.0000006328](#)  
 one-way ANOVA (oral) [p-value = 0.0000533232](#)

two-way ANOVA [p-value = 3.550410e-1](#)

##### LCM/TaqMan

|      | skin | oral    | stdev (s) | stdev (o) |         |
|------|------|---------|-----------|-----------|---------|
| hour | 0    | 1.13827 | 0.73804   | 0.50428   | 0.18046 |
|      | 6    | 1.96972 | 1.24938   | 1.08421   | 0.37058 |
|      | 24   | 0.19846 | 0.13364   | 0.13421   | 0.06417 |
|      | 120  | 1.39059 | 0.99888   | 0.90191   | 0.10161 |

one-way ANOVA (skin) [p-value = 0.0034683330](#)

one-way ANOVA (oral) p-value = 0.0505159562

two-way ANOVA p-value = 6.257289e-1

one-way ANOVA (oral) p-value = 0.0000341469

two-way ANOVA p-value = 1.078114e-3

**Supplementary Table S5: Statistical analysis on wound closure**

**A: in vitro wounds treated with control and miR-21 mimic**

**A.1: 2way ANOVA - in vitro wounds treated with control and miR-21 mimic**

| Two-way ANOVA             |       | Ordinary |       |                   |            |     | Significant? |
|---------------------------|-------|----------|-------|-------------------|------------|-----|--------------|
| Alpha                     |       | 0.05     |       |                   |            |     |              |
| ANOVA table               | SS    | DF       | MS    | F (DFn, DFd)      | P value    |     |              |
| Interaction               | 688   | 3        | 229.3 | F (3, 18) = 3.006 | P = 0.0575 | No  |              |
| Row Factor (time)         | 12361 | 3        | 4120  | F (3, 18) = 54.01 | P < 0.0001 | Yes |              |
| Column Factor (treatment) | 6790  | 1        | 6790  | F (1, 18) = 89.00 | P < 0.0001 | Yes |              |
| Residual                  | 1373  | 18       | 76.29 |                   |            |     |              |

**A.2: Bonferroni's multiple comparisons test - in vitro wounds treated with control and miR-21 mimic**

|       |       | Mean (ctrl) | Mean (miR-21) | Mean Diff. | 95% CI of diff.  | Significant? | Summary | Adjusted P Value |
|-------|-------|-------------|---------------|------------|------------------|--------------|---------|------------------|
| day 1 | Row 1 | 15.49       | 32.27         | -16.78     | -35.29 to 1.727  | No           | ns      | 0.0864           |
| day 2 | Row 2 | 17.44       | 64.13         | -46.69     | -68.81 to -24.57 | Yes          | ****    | < 0.0001         |
| day 3 | Row 3 | 53.88       | 90.14         | -36.26     | -54.77 to -17.75 | Yes          | ***     | 0.0001           |
| day 4 | Row 4 | 58.83       | 91.54         | -32.71     | -51.21 to -14.20 | Yes          | ***     | 0.0005           |

**B: in vitro wounds treated with control and miR-31 mimic**

**B.1: 2way ANOVA - in vitro wounds treated with control and miR-31 mimic**

| Two-way ANOVA             |       | Ordinary |       |                   |            |     | Significant? |
|---------------------------|-------|----------|-------|-------------------|------------|-----|--------------|
| Alpha                     |       | 0.05     |       |                   |            |     |              |
| ANOVA table               | SS    | DF       | MS    | F (DFn, DFd)      | P value    |     |              |
| Interaction               | 1579  | 3        | 526.3 | F (3, 22) = 10.79 | P = 0.0001 | Yes |              |
| Row Factor (time)         | 12314 | 3        | 4105  | F (3, 22) = 84.16 | P < 0.0001 | Yes |              |
| Column Factor (treatment) | 16346 | 1        | 16346 | F (1, 22) = 335.2 | P < 0.0001 | Yes |              |
| Residual                  | 1073  | 22       | 48.77 |                   |            |     |              |

**B.2: Bonferroni's multiple comparisons test - in vitro wounds treated with control and miR-31 mimic**

|       |       | Mean (ctrl) | Mean (miR-31) | Mean Diff. | 95% CI of diff.  | Significant? | Summary | Adjusted P Value |
|-------|-------|-------------|---------------|------------|------------------|--------------|---------|------------------|
| day 1 | Row 1 | 15.49       | 45.93         | -30.44     | -43.87 to -17.01 | Yes          | ****    | < 0.0001         |
| day 2 | Row 2 | 17.44       | 91.49         | -74.05     | -90.50 to -57.60 | Yes          | ****    | < 0.0001         |
| day 3 | Row 3 | 53.88       | 100           | -46.12     | -59.55 to -32.69 | Yes          | ****    | < 0.0001         |
| day 4 | Row 4 | 58.83       | 100           | -41.17     | -54.60 to -27.73 | Yes          | ****    | < 0.0001         |

**C: in vivo murine skin wounds treated with control and miR-21 mimic**

**C.1: 2way ANOVA - in vivo murine skin wounds treated with control and miR-21 mimic**

| Two-way ANOVA             |       | Ordinary |       |                    |            |     | Significant? |
|---------------------------|-------|----------|-------|--------------------|------------|-----|--------------|
| Alpha                     |       | 0.05     |       |                    |            |     |              |
| ANOVA table               | SS    | DF       | MS    | F (DFn, DFd)       | P value    |     |              |
| Interaction               | 137.4 | 9        | 15.27 | F (9, 90) = 0.3972 | P = 0.9335 | No  |              |
| Row Factor (time)         | 78932 | 9        | 8770  | F (9, 90) = 228.1  | P < 0.0001 | Yes |              |
| Column Factor (treatment) | 259.5 | 1        | 259.5 | F (1, 90) = 6.751  | P = 0.0109 | Yes |              |
| Residual                  | 3460  | 90       | 38.44 |                    |            |     |              |

**C.2: Bonferroni's multiple comparisons test - in vivo murine skin wounds treated with control and miR-21 mimic**

|        |        | Mean (ctrl) | Mean (miR-21) | Mean Diff. | 95% CI of diff. | Significant? | Summary | Adjusted P Value |
|--------|--------|-------------|---------------|------------|-----------------|--------------|---------|------------------|
| day 1  | Row 1  | 15.91       | 18.62         | -2.708     | -13.51 to 8.097 | No           | ns      | > 0.9999         |
| day 2  | Row 2  | 27.35       | 33.92         | -6.57      | -17.37 to 4.235 | No           | ns      | 0.8354           |
| day 3  | Row 3  | 40.3        | 40.68         | -0.3766    | -11.18 to 10.43 | No           | ns      | > 0.9999         |
| day 4  | Row 4  | 51.2        | 52.35         | -1.146     | -11.95 to 9.659 | No           | ns      | > 0.9999         |
| day 5  | Row 5  | 58.17       | 61.45         | -3.28      | -14.08 to 7.525 | No           | ns      | > 0.9999         |
| day 6  | Row 6  | 61.85       | 68.09         | -6.237     | -17.04 to 4.567 | No           | ns      | > 0.9999         |
| day 7  | Row 7  | 70.57       | 76.67         | -6.107     | -16.91 to 4.698 | No           | ns      | > 0.9999         |
| day 8  | Row 8  | 92.89       | 94.15         | -1.26      | -12.06 to 9.545 | No           | ns      | > 0.9999         |
| day 9  | Row 9  | 96.26       | 97.7          | -1.432     | -12.24 to 9.373 | No           | ns      | > 0.9999         |
| day 10 | Row 10 | 97.51       | 99.25         | -1.732     | -12.54 to 9.073 | No           | ns      | > 0.9999         |

**D: in vivo murine skin wounds treated with control and miR-31 mimic**

**D.1: 2way ANOVA - in vivo murine skin wounds treated with control and miR-31 mimic**

| Two-way ANOVA             |       | Ordinary |       |                    |            |     | Significant? |
|---------------------------|-------|----------|-------|--------------------|------------|-----|--------------|
| Alpha                     |       | 0.05     |       |                    |            |     |              |
| ANOVA table               | SS    | DF       | MS    | F (DFn, DFd)       | P value    |     |              |
| Interaction               | 2000  | 9        | 222.2 | F (9, 100) = 5.096 | P < 0.0001 | Yes |              |
| Row Factor (time)         | 66462 | 9        | 7385  | F (9, 100) = 169.4 | P < 0.0001 | Yes |              |
| Column Factor (treatment) | 4887  | 1        | 4887  | F (1, 100) = 112.1 | P < 0.0001 | Yes |              |
| Residual                  | 4360  | 100      | 43.6  |                    |            |     |              |

**D.2: Bonferroni's multiple comparisons test - in vivo murine skin wounds treated with control and miR-31 mimic**

|        |        | Mean (ctrl) | Mean (miR-31) | Mean Diff. | 95% CI of diff.   | Significant? | Summary | Adjusted P Value |
|--------|--------|-------------|---------------|------------|-------------------|--------------|---------|------------------|
| day 1  | Row 1  | 15.91       | 34.05         | -18.14     | -29.08 to -7.194  | Yes          | ****    | < 0.0001         |
| day 2  | Row 2  | 27.35       | 54.9          | -27.54     | -38.48 to -16.60  | Yes          | ****    | < 0.0001         |
| day 3  | Row 3  | 40.3        | 63.57         | -23.26     | -34.21 to -12.32  | Yes          | ****    | < 0.0001         |
| day 4  | Row 4  | 51.2        | 65.9          | -14.7      | -25.64 to -3.753  | Yes          | **      | 0.002            |
| day 5  | Row 5  | 58.17       | 68.4          | -10.23     | -21.18 to 0.7104  | No           | ns      | 0.0851           |
| day 6  | Row 6  | 61.85       | 75.37         | -13.52     | -24.46 to -2.574  | Yes          | **      | 0.006            |
| day 7  | Row 7  | 70.57       | 82.33         | -11.77     | -22.71 to -0.8251 | Yes          | *       | 0.0262           |
| day 8  | Row 8  | 92.89       | 96.39         | -3.495     | -14.44 to 7.449   | No           | ns      | > 0.9999         |
| day 9  | Row 9  | 96.26       | 99.05         | -2.787     | -13.73 to 8.157   | No           | ns      | > 0.9999         |
| day 10 | Row 10 | 97.51       | 99.7          | -2.187     | -13.13 to 8.757   | No           | ns      | > 0.9999         |

## Supplementary Table S6a: Bioinformatics prediction of pathways targeted by mmu-miR-31-3p

| KEGG pathway                          | p-value    | #genes targeted | gene targeted                               |
|---------------------------------------|------------|-----------------|---------------------------------------------|
| Steroid biosynthesis                  | 1.22E-08   | 1               | Dhcr24                                      |
| Steroid hormone biosynthesis          | 4.39E-07   | 1               | Hsd3b1                                      |
| Vitamin B6 metabolism                 | 0.00946592 | 1               | Sh3bp1                                      |
| Thiamine metabolism                   | 0.00948411 | 1               | Tpk1                                        |
| Adrenergic signaling in cardiomyocyte | 0.00948411 | 3               | Ppp2r2a, Cacnb2, Ppp2r3c                    |
| Sphingolipid metabolism               | 0.02507051 | 2               | Sgpp2, B4galt6                              |
| B cell receptor signaling pathway     | 0.02624945 | 3               | Vav3, Cd72, Ppp3ca                          |
| MAPK signaling pathway                | 0.03228995 | 6               | Mef2c, Map3k1, Cacnb2, Dusp7, Rasa1, Ppp3ca |
| Taurine and hypotaurine metabolism    | 0.04608911 | 1               | Gad2                                        |
| Gap junction                          | 0.04672907 | 1               | Gjd2                                        |
| Ovarian steroidogenesis               | 0.04672907 | 1               | Hsd3b1                                      |
| mRNA surveillance pathway             | 0.04845908 | 4               | Ppp2r2a, Cpsf2, Ppp2r3c, Nxf1               |
| Axon guidance                         | 0.04845908 | 4               | Rasa1, Ppp3ca, EphA7, Sema6c                |

MicroRNA targeted pathway analysis were performed using DIANA-mirPath (v3.0), with microT-CDS as microRNA target prediction method (microT threshold = 0.8). A cut off p value of 0.05 was used.

## Supplementary Table S6b: Bioinformatics prediction of pathways targeted by Cluster IV microRNAs

| KEGG pathway                      | p-value    | #microRNAs | #genes targeted | microRNA                                                                                                    | gene                                                                                                                                                                      |
|-----------------------------------|------------|------------|-----------------|-------------------------------------------------------------------------------------------------------------|---------------------------------------------------------------------------------------------------------------------------------------------------------------------------|
| Steroid hormone biosynthesis      | 7.68E-20   | 3          | 10              | mmu-miR-126a-5p<br>mmu-miR-31-5p<br>mmu-miR-34c-5p                                                          | Ugt1a6b, Ugt1a2, Ugt1a9, Ugt1a10, Ugt1a7c, Ugt1a5, Ugt1a1, Ugt1a6;<br>Hsd3b1<br>Cyp2c54                                                                                   |
| Drug metabolism - cytochrome P450 | 5.25E-05   | 1          | 8               | mmu-miR-126a-5p                                                                                             | Ugt1a6b, Ugt1a2, Ugt1a9, Ugt1a10, Ugt1a7c, Ugt1a5, Ugt1a1, Ugt1a6;                                                                                                        |
| Dorso-ventral axis formation      | 0.00010201 | 5          | 10              | mmu-miR-34c-5p<br>mmu-miR-24-2-5p<br>mmu-miR-199b-3p<br>mmu-miR-126a-5p<br>mmu-miR-199a-5p                  | Notch1, Map2k1, Notch2, Notch4<br>Kras<br>Cpeb3<br>Cpeb2, Sos1<br>Sos2, Ets1                                                                                              |
| Gap junction                      | 0.00062218 | 6          | 9               | mmu-miR-34c-5p<br>mmu-miR-126a-5p<br>mmu-miR-199b-3p<br>mmu-miR-31-5p<br>mmu-miR-199a-5p<br>mmu-miR-24-2-5p | Map2k1, Grm1<br>Sos1, Map3k2<br>Plcb1, Gja1<br>Gjd2<br>Sos2<br>Kras                                                                                                       |
| Proteoglycans in cancer           | 0.00062218 | 6          | 23              | mmu-miR-34c-5p<br>mmu-miR-199a-5p<br>mmu-miR-126a-5p<br>mmu-miR-199b-3p<br>mmu-miR-24-2-5p<br>mmu-miR-31-5p | Map2k1, Camk2b, Araf, Met, Rras<br>Tgfb2, Sos2, Wnt7b, Fzd10, Fzd4, Fzd5<br>ErbB4, Wnt16, Ank3, Sos1, Cd44<br>Cblb, Igf1, ErbB4, Arhgef12, Fn1, Met, Mtor<br>Kras<br>Fzd3 |
| AMPK signaling pathway            | 0.00381211 | 7          | 18              | mmu-miR-34c-5p<br>mmu-miR-24-2-5p<br>mmu-miR-199a-5p<br>mmu-miR-199b-3p<br>mmu-miR-31-5p                    | Irs4, Ppp2r3a, Creb1, Ppp2r5e<br>Ppp2r5c<br>Rab10, Slc2a4, Stradb, Prkag2, Sirt1<br>Scd2, Ppp2r2a, Igf1, Scd4, Mtor<br>Ppp2r2a, Ppp2r3c, Sirt1                            |

|                                   |            |   |    |                                                                                          |                                                                                                                                |
|-----------------------------------|------------|---|----|------------------------------------------------------------------------------------------|--------------------------------------------------------------------------------------------------------------------------------|
|                                   |            |   |    | mmu-miR-126a-5p<br>mmu-miR-126a-3p                                                       | Ppargc1a<br>Irs1                                                                                                               |
| Wnt signaling pathway             | 0.00682663 | 5 | 16 | mmu-miR-31-5p<br>mmu-miR-126a-5p<br>mmu-miR-199b-3p<br>mmu-miR-199a-5p<br>mmu-miR-34c-5p | Fzd3, Ppp3ca<br>Axin1, Wnt16, Cxxc4, Ppp3ca<br>Csnk1a1, Plcb1, Mapk8<br>Wnt7b, Gsk3b, Fzd10, Fzd4, Fzd5<br>Lef1, Camk2b, Daam1 |
| Ascorbate and aldarate metabolism | 0.00721958 | 1 | 8  | mmu-miR-126a-5p                                                                          | Ugt1a6b, Ugt1a2, Ugt1a9, Ugt1a10, Ugt1a7c, Ugt1a5, Ugt1a1, Ugt1a6:                                                             |

MicroRNA targeted pathway analysis were performed using DIANA-mirPath (v3.0), with microT-CDS as microRNA target prediction method (microT threshold = 0.8). A cut off p value of 0.01 was used.
